# Supplementary material for: CD38 Deficiency Promotes Inflammatory Response through Activating Sirt1/NF-κB-Mediated Inhibition of TLR2 Expression in Macrophages
Source: Hindawi journal article supplement (doi:10.1155/2018/8736949), 2018-05-27
Supplement: f1 [file 8736949.f1.pdf]

Mouse CD38 gene knockdown was performed using CRISPR interference (CRISPRi). Different sites upstream (MusCD38-up1 and MusCD38-up2) or in the exons (MusCD38-E1a, MusCD38-E1b, MusCD38-E1c and MusCD38-E3) of CD38 gene were selected and ligated to human sgRNA plasmid to block transcription initiation or elongation. All sgRNA sequences target to mouse CD38 gene were summarized in Tab. S1.

Tab. S1. sgRNA sequences target to mouse CD38 gene

| Name        | Sequences                                                                                          |
|-------------|----------------------------------------------------------------------------------------------------|
| MusCD38-up1 | GGAGAACCACCTTGTGG <u>GGCTCCCGAAGACTGGCCC</u> GTTTTAGAGCT<br>AGAAATAGCAAGTTAAAATAAGGC               |
| MusCD38-up2 | GGAGAACCACCTTGTGG <u>GAACTTTGGAGCAGGAGTAG</u> GTTTTAGAGCT<br>AGAAATAGCAAGTTAAAATAAGGC              |
| MusCD38-E1a | GGAGAACCACCTTGTGG <u>GCCGCGCTCACTCCTGGT</u> GTTTTAGAGCTAG<br>AAATAGCAAGTTAAAATAAGGC                |
| MusCD38-E1b | GGAGAACCACCTTGTGGG <u>GACCCACTCCGAGACCGATC</u> GTTTTAGAGC<br>TAGAAATAGCAAGTTAAAATAAGGC             |
| MusCD38-E1c | GGAGAACCACCTTGTGG <u>GACCACGATCCCTACTACCA</u> GTTTTAGAGCT<br>AGAAATAGCAAGTTAAAATAAGGC              |
| MusCD38-E3  | GGAGAACCACCTTGTGG <u>GCTGATGATCTCAGGTGGTG</u> GTTTTAGAGCT<br>AGAAATAGCAAGTTAAAATAAGGC              |
| sgRNA R     | CCTAGTACTCGAGAAAAAAGCACCGACTCGGTGCCACTTTTTCAAGTT<br>GATAACGGACTAGCCTTATTTAACTTGCTATTTCTAGCTCTAAAAC |

The sgRNA-targeting sequences are underlined and are indicated in red.
